# Supplementary material
Source: PubMed Central journal article supplement (PMC4553075)
Supplement: NIHMS707178-supplement-304792R4_Online_Data_Supplement.pdf [file NIHMS707178-supplement-304792R4_Online_Data_Supplement.pdf]

**Online Table I.** Procedures performed in control patients

| <b>Study</b>               | <b>Cardiac catheterization</b> | <b>Bone marrow aspiration</b> | <b>Placebo injection</b>      |
|----------------------------|--------------------------------|-------------------------------|-------------------------------|
| Ang et al. 2008            | No (CABG)                      | No                            | No                            |
| Assmus et al. 2006         | No                             | No                            | No                            |
| Bartunek et al. 2013       | No                             | No                            | No                            |
| Cao et al. 2009            | Yes                            | No                            | Yes (Saline + Heparin)        |
| Chen et al. 2004           | Yes                            | No                            | Yes (Saline)                  |
| Colombo et al. 2011        | No                             | No                            | No                            |
| Gao et al. 2013            | No                             | No                            | No                            |
| Ge et al. 2006             | Yes                            | Yes                           | Yes (bone marrow supernatant) |
| Grajek et al. 2010         | Yes                            | No                            | No                            |
| Hendriks et al. 2006       | Yes                            | No                            | Yes (Saline + Heparin)        |
| Hirsch et al. 2011         | No                             | No                            | No                            |
| Huang et al. 2006          | No                             | No                            | No                            |
| Huikuri et al. 2008        | Yes                            | No                            | Yes (Saline)                  |
| Janssens et al. 2006       | Yes                            | Yes                           | Yes (Saline + Serum)          |
| Jazi et al. 2012           | Yes                            | No                            | No                            |
| Lipiec et al. 2009         | No                             | No                            | No                            |
| Lu et al. 2013             | Yes                            | Yes                           | Yes (Saline + Serum)          |
| Lunde et al. 2006          | No                             | No                            | No                            |
| Maureira et al. 2012       | No (CABG)                      | No                            | No                            |
| Meluzin et al. 2006        | No                             | No                            | No                            |
| Meyer et al. 2006          | No                             | No                            | No                            |
| Nogueira et al. 2009       | No                             | No                            | No                            |
| Penicka et al. 2007        | No                             | No                            | No                            |
| Perin et al. 2011          | Yes                            | No                            | No                            |
| Perin et al. AHJ 2012      | Yes                            | Yes                           | Yes (Saline + 5% Albumin)     |
| Perin et al. JAMA 2012     | Yes                            | Yes                           | Yes (Cell free suspension)    |
| Piepoli et al. 2013        | No                             | No                            | No                            |
| Plewka et al. 2011         | No                             | No                            | No                            |
| Pokushalov et al. 2010     | No                             | No                            | No                            |
| Quyumi et al. 2011         | No                             | No                            | No                            |
| Ramshorst et al. 2009      | Yes                            | Yes                           | Yes (Saline + 5% Albumin)     |
| Roncalli et al. 2011       | No                             | No                            | No                            |
| Ruan et al. 2005           | Yes                            | No                            | Yes (Diluted Serum)           |
| Schachinger et al. 2006    | Yes                            | Yes                           | Yes (Serum + Cambrex)         |
| Silva et al. 2009          | No                             | No                            | No                            |
| Srimahachota et al. 2011   | No                             | No                            | No                            |
| Suarez de Lezo et al. 2007 | No                             | No                            | No                            |
| Surder et al. 2013         | No                             | No                            | No                            |

|                                         |     |     |                               |
|-----------------------------------------|-----|-----|-------------------------------|
| Traverse et al. 2010                    | Yes | Yes | Yes (Saline + Albumin)        |
| Traverse et al. 2011                    | Yes | Yes | Yes (Saline + Albumin + RBCs) |
| Traverse et al. 2014                    | Yes | Yes | Yes (Saline + Albumin + RBCs) |
| Tse et al. 2007                         | Yes | Yes | Yes (Autologous plasma)       |
| Turan et al. 2012                       | No  | No  | No                            |
| Turan et al. 2011<br>(Stem Cell Review) | No  | No  | No                            |
| Wohrle et al. 2013                      | Yes | Yes | Yes (Saline + Albumin + RBCs) |
| Yao et al. 2008                         | Yes | No  | Yes (Saline + Heparin)        |
| Yao et al. 2009                         | Yes | No  | Yes (Saline + Heparin)        |
| Zhao et al. 2008                        | Yes | No  | Yes (Saline + Heparin)        |

**Abbreviations:** CABG, coronary artery bypass graft surgery; RBC, red blood cell

**Online Table II.** Trials with Discrepancies in Reporting Outcomes/Results

| <b>Source</b>            | <b>Total Number of Discrepancies in Results</b> |
|--------------------------|-------------------------------------------------|
| Colombo et al. 2011      | 6                                               |
| Huikuri et al. 2008      | 13                                              |
| Lunde et al. 2006        | 4                                               |
| Meyer et al. 2006        | 5                                               |
| Srimahachota et al. 2011 | 5                                               |
| Traverse et al. 2010     | 5                                               |
| Zhao et al. 2008         | 38                                              |

**Online Table III.** Quality assessment scale for studies included in meta-analysis

|                        | Selection                 |                                                    |                                                | Performance | Detection | Attrition                                                 |                                      |
|------------------------|---------------------------|----------------------------------------------------|------------------------------------------------|-------------|-----------|-----------------------------------------------------------|--------------------------------------|
|                        | Was allocation adequate?* | Was an adequate method of randomization described? | Were groups similar at the start of the study? |             |           | Were the patients/caregivers blinded to the intervention? | Was the outcome ascertained blindly? |
| Ang et al. 2008        | Y                         | N                                                  | Y                                              | Y           | Y         | 8%                                                        | N                                    |
| Assmus et al. 2006     | Y                         | N                                                  | Y                                              | N           | Y         | 8.60 %                                                    | Y                                    |
| Bartunek et al. 2013   | Y                         | N                                                  | Y                                              | N           | Y         | 0                                                         | Y                                    |
| Cao et al. 2009        | Y                         | Y                                                  | Y                                              | NR          | Y         | 0                                                         | Y                                    |
| Chen et al. 2004       | Y                         | N                                                  | Y                                              | Y           | Y         | 0                                                         | Y                                    |
| Colombo et al. 2011    | Y                         | Y                                                  | Y                                              | Y           | Y         | 0                                                         | Y                                    |
| Gao et al. 2013        | N                         | Y                                                  | N                                              | N           | Y         | 2.30 %                                                    | Y                                    |
| Ge et al. 2006         | Y                         | Y                                                  | Y                                              | N           | Y         | 0                                                         | Y                                    |
| Grajek et al. 2010     | Y                         | Y                                                  | Y                                              | N           | Y         | 0                                                         | Y                                    |
| Hendrikkx et al. 2006  | Y                         | Y                                                  | Y                                              | Y           | Y         | 1%                                                        | Y                                    |
| Hirsch et al. 2011     | Y                         | Y                                                  | Y                                              | N           | Y         | 0                                                         | Y                                    |
| Huang et al. 2006      | Y                         | Y                                                  | Y                                              | Y           | Y         | 3.70 %                                                    | Y                                    |
| Huikuri et al. 2008    | Y                         | Y                                                  | Y                                              | N           | Y         | 0                                                         | Y                                    |
| Janssens et al. 2006   | Y                         | Y                                                  | Y                                              | Y           | Y         | 10 %                                                      | Y                                    |
| Jazi et al. 2012       | Y                         | Y                                                  | Y                                              | N           | NR        | 0                                                         | Y                                    |
| Lipiec et al. 2009     | Y                         | Y                                                  | Y                                              | N           | Y         | 5 %                                                       | N                                    |
| Lu et al. 2013         | Y                         | N                                                  | Y                                              | Y           | Y         | 6 %                                                       | Y                                    |
| Lunde et al. 2006      | Y                         | N                                                  | Y                                              | NR          | Y         | 9 %                                                       | N                                    |
| Maureira et al. 2012   | Y                         | N                                                  | Y                                              | N           | NR        | 0                                                         | Y                                    |
| Meluzin et al. 2006    | Y                         | Y                                                  | Y                                              | Y           | Y         | 0                                                         | Y                                    |
| Meyer et al. 2006      | Y                         | Y                                                  | NR                                             | NR          | NR        | 11 %                                                      | N                                    |
| Nogueira et al. 2009   | Y                         | Y                                                  | Y                                              | NR          | NR        | 0                                                         | Y                                    |
| Penicka et al. 2007    | Y                         | N                                                  | Y                                              | NR          | Y         | 0                                                         | Y                                    |
| Perin et al. 2011      | Y                         | Y                                                  | Y                                              | Y           | Y         | 0                                                         | Y                                    |
| Perin et al. AHJ 2012  | Y                         | Y                                                  | Y                                              | Y           | Y         | 5                                                         | Y                                    |
| Perin et al. JAMA 2012 | Y                         | Y                                                  | Y                                              | Y           | Y         | 4.30 %                                                    | Y                                    |
| Piepoli et al. 2013    | Y                         | Y                                                  | Y                                              | N           | Y         | 0                                                         | Y                                    |

|                                      |   |   |   |    |   |         |   |
|--------------------------------------|---|---|---|----|---|---------|---|
| Plewka et al. 2011                   | Y | Y | Y | N  | Y | 0       | N |
| Pokushalov et al. 2010               | Y | Y | Y | Y  | Y | 18 %    | Y |
| Quyumi et al. 2011                   | Y | N | Y | Y  | Y | 0       | Y |
| Ramshorst et al. 2009                | Y | Y | Y | NR | Y | 0       | Y |
| Roncalli et al. 2011                 | Y | Y | Y | N  | Y | 0       | Y |
| Ruan et al. 2005                     | Y | Y | Y | Y  | Y | 0       | Y |
| Schachinger et al. 2006              | Y | Y | Y | N  | Y | 0       | Y |
| Silva et al. 2009                    | N | Y | Y | N  | Y | 0       | Y |
| Srimahachota et al. 2011             | Y | Y | Y | Y  | Y | 0       | Y |
| Suarez de Lezo et al. 2007           | Y | Y | Y | Y  | Y | 7 %     | Y |
| Surder et al. 2013                   | Y | Y | Y | N  | Y | 11.50 % | Y |
| Traverse et al. 2010                 | Y | Y | Y | Y  | Y | 4.70 %  | Y |
| Traverse et al. 2011                 | Y | Y | Y | Y  | Y | 0       | Y |
| Traverse et al. 2014                 | Y | Y | Y | Y  | Y | 10.70 % | Y |
| Tse et al. 2007                      | Y | Y | Y | NR | Y | 13 %    | N |
| Turan et al. 2012                    | Y | Y | Y | N  | Y | 5.50 %  | Y |
| Turan et al. 2011 (Stem Cell Review) | Y | Y | Y | N  | Y | 0       | Y |
| Wohrle et al. 2013                   | Y | Y | Y | Y  | Y | NA      | Y |
| Yao et al. 2008                      | Y | Y | Y | N  | Y | 0       | N |
| Yao et al. 2009                      | Y | Y | Y | N  | Y | 0       | Y |
| Zhao et al. 2008                     | Y | N | Y | N  | Y | 0       | y |

N, No; NA, not available; NR, not reported; Y, Yes

\*'Adequate' means the use of a central site, numeric codes, opaque envelopes, drugs prepared by pharmacy, and other appropriate procedures as described by Juni et al.

**Online Figure I.** Search results from PubMed.

**Online Figure II. Impact of BMC transplantation on LV ejection fraction.** Forest plot of unadjusted difference in mean (with 95% confidence intervals [CIs]) change in left ventricular ejection fraction (LVEF) in patients treated with bone marrow cells (BMCs) compared with controls in RCTs after excluding studies with discrepant reporting of outcomes of interest. Transplantation of BMCs resulted in a 2.90% (95% CI, 1.83–3.97;  $P < 0.00001$ ) increase in mean LVEF. The overall effect was statistically significant in favor of BMC transplantation. IV, inverse variance.

**Online Figure III. Impact of BMC transplantation on infarct size.** Forest plot of unadjusted difference in mean (with 95% confidence intervals [CIs]) change in infarct scar size in patients treated with bone marrow cells (BMCs) compared with controls in included RCTs after excluding studies with discrepant reporting of outcomes of interest. Transplantation of BMCs resulted in a 2.21% (95% CI, -3.61 to -0.82;  $P < 0.002$ ) decrease in mean infarct scar size. The overall effect was statistically significant in favor of BMC transplantation. IV, inverse variance.

**Online Figure IV. Impact of BMC transplantation on LVESV.** Forest plot of unadjusted difference in mean (with 95% confidence intervals [CIs]) change in left ventricular end-systolic volume (LVESV) in patients treated with bone marrow cells (BMCs) compared with controls in included RCTs after excluding studies with discrepant reporting of outcomes of interest. Transplantation of BMCs resulted in 7.14 ml (95% CI, -10.14 to -4.15;  $P < 0.00001$ ) decrease in LVESV. The overall effect was statistically significant in favor of BMC transplantation. IV, inverse variance.

**Online Figure V. Impact of BMC transplantation on LVEDV.** Forest plot of unadjusted difference in mean (with 95% confidence intervals [CIs]) change in left ventricular end-diastolic volume (LVEDV) in patients treated with bone marrow cells (BMCs) compared with controls in included RCTs after excluding studies with discrepant reporting of outcomes of interest. BMC transplantation resulted in a 1.52 ml (95% CI, -3.78 to 0.74;  $P = 0.19$ ) decrease in mean LVEDV. The overall effect was not significant statistically. IV, inverse variance.

**Online Figure I.** Search results from PubMed

| Search              | Add to builder      | Query                                                          | Items found            | Time     |
|---------------------|---------------------|----------------------------------------------------------------|------------------------|----------|
| <a href="#">#17</a> | <a href="#">Add</a> | Search <b>#7 AND #15 Limits: Humans, All Adult: 19 + years</b> | <a href="#">2498</a>   | 18:09:35 |
| <a href="#">#16</a> | <a href="#">Add</a> | Search <b>#7 AND #15</b>                                       | <a href="#">8289</a>   | 18:07:26 |
| <a href="#">#15</a> | <a href="#">Add</a> | Search <b>#8 OR #9 OR #10 OR #11 OR #12 OR #13 OR #14</b>      | <a href="#">506545</a> | 18:06:39 |
| <a href="#">#14</a> | <a href="#">Add</a> | Search <b>heart failure</b>                                    | <a href="#">176137</a> | 18:06:17 |
| <a href="#">#13</a> | <a href="#">Add</a> | Search <b>chronic ischemic heart disease</b>                   | <a href="#">28811</a>  | 18:06:03 |
| <a href="#">#12</a> | <a href="#">Add</a> | Search <b>ischemic cardiomyopathy</b>                          | <a href="#">16655</a>  | 18:05:21 |
| <a href="#">#11</a> | <a href="#">Add</a> | Search <b>cardiomyopathy</b>                                   | <a href="#">92317</a>  | 18:05:08 |
| <a href="#">#10</a> | <a href="#">Add</a> | Search <b>coronary artery disease</b>                          | <a href="#">123633</a> | 18:04:16 |
| <a href="#">#9</a>  | <a href="#">Add</a> | Search <b>acute myocardial infarction</b>                      | <a href="#">74210</a>  | 18:03:59 |
| <a href="#">#8</a>  | <a href="#">Add</a> | Search <b>myocardial infarction</b>                            | <a href="#">198546</a> | 18:03:46 |
| <a href="#">#7</a>  | <a href="#">Add</a> | Search <b>#1 OR #2 OR #3 OR #4 OR #5 OR #6</b>                 | <a href="#">437077</a> | 18:02:18 |
| <a href="#">#6</a>  | <a href="#">Add</a> | Search <b>progenitor cells</b>                                 | <a href="#">224760</a> | 18:01:30 |
| <a href="#">#5</a>  | <a href="#">Add</a> | Search <b>progenitor cell</b>                                  | <a href="#">224228</a> | 18:01:19 |
| <a href="#">#4</a>  | <a href="#">Add</a> | Search <b>stem cells</b>                                       | <a href="#">212854</a> | 18:01:04 |
| <a href="#">#3</a>  | <a href="#">Add</a> | Search <b>stem cell</b>                                        | <a href="#">257595</a> | 18:00:53 |
| <a href="#">#2</a>  | <a href="#">Add</a> | Search <b>bone marrow cells</b>                                | <a href="#">223445</a> | 18:00:42 |
| <a href="#">#1</a>  | <a href="#">Add</a> | Search <b>bone marrow cell</b>                                 | <a href="#">250800</a> | 18:00:34 |

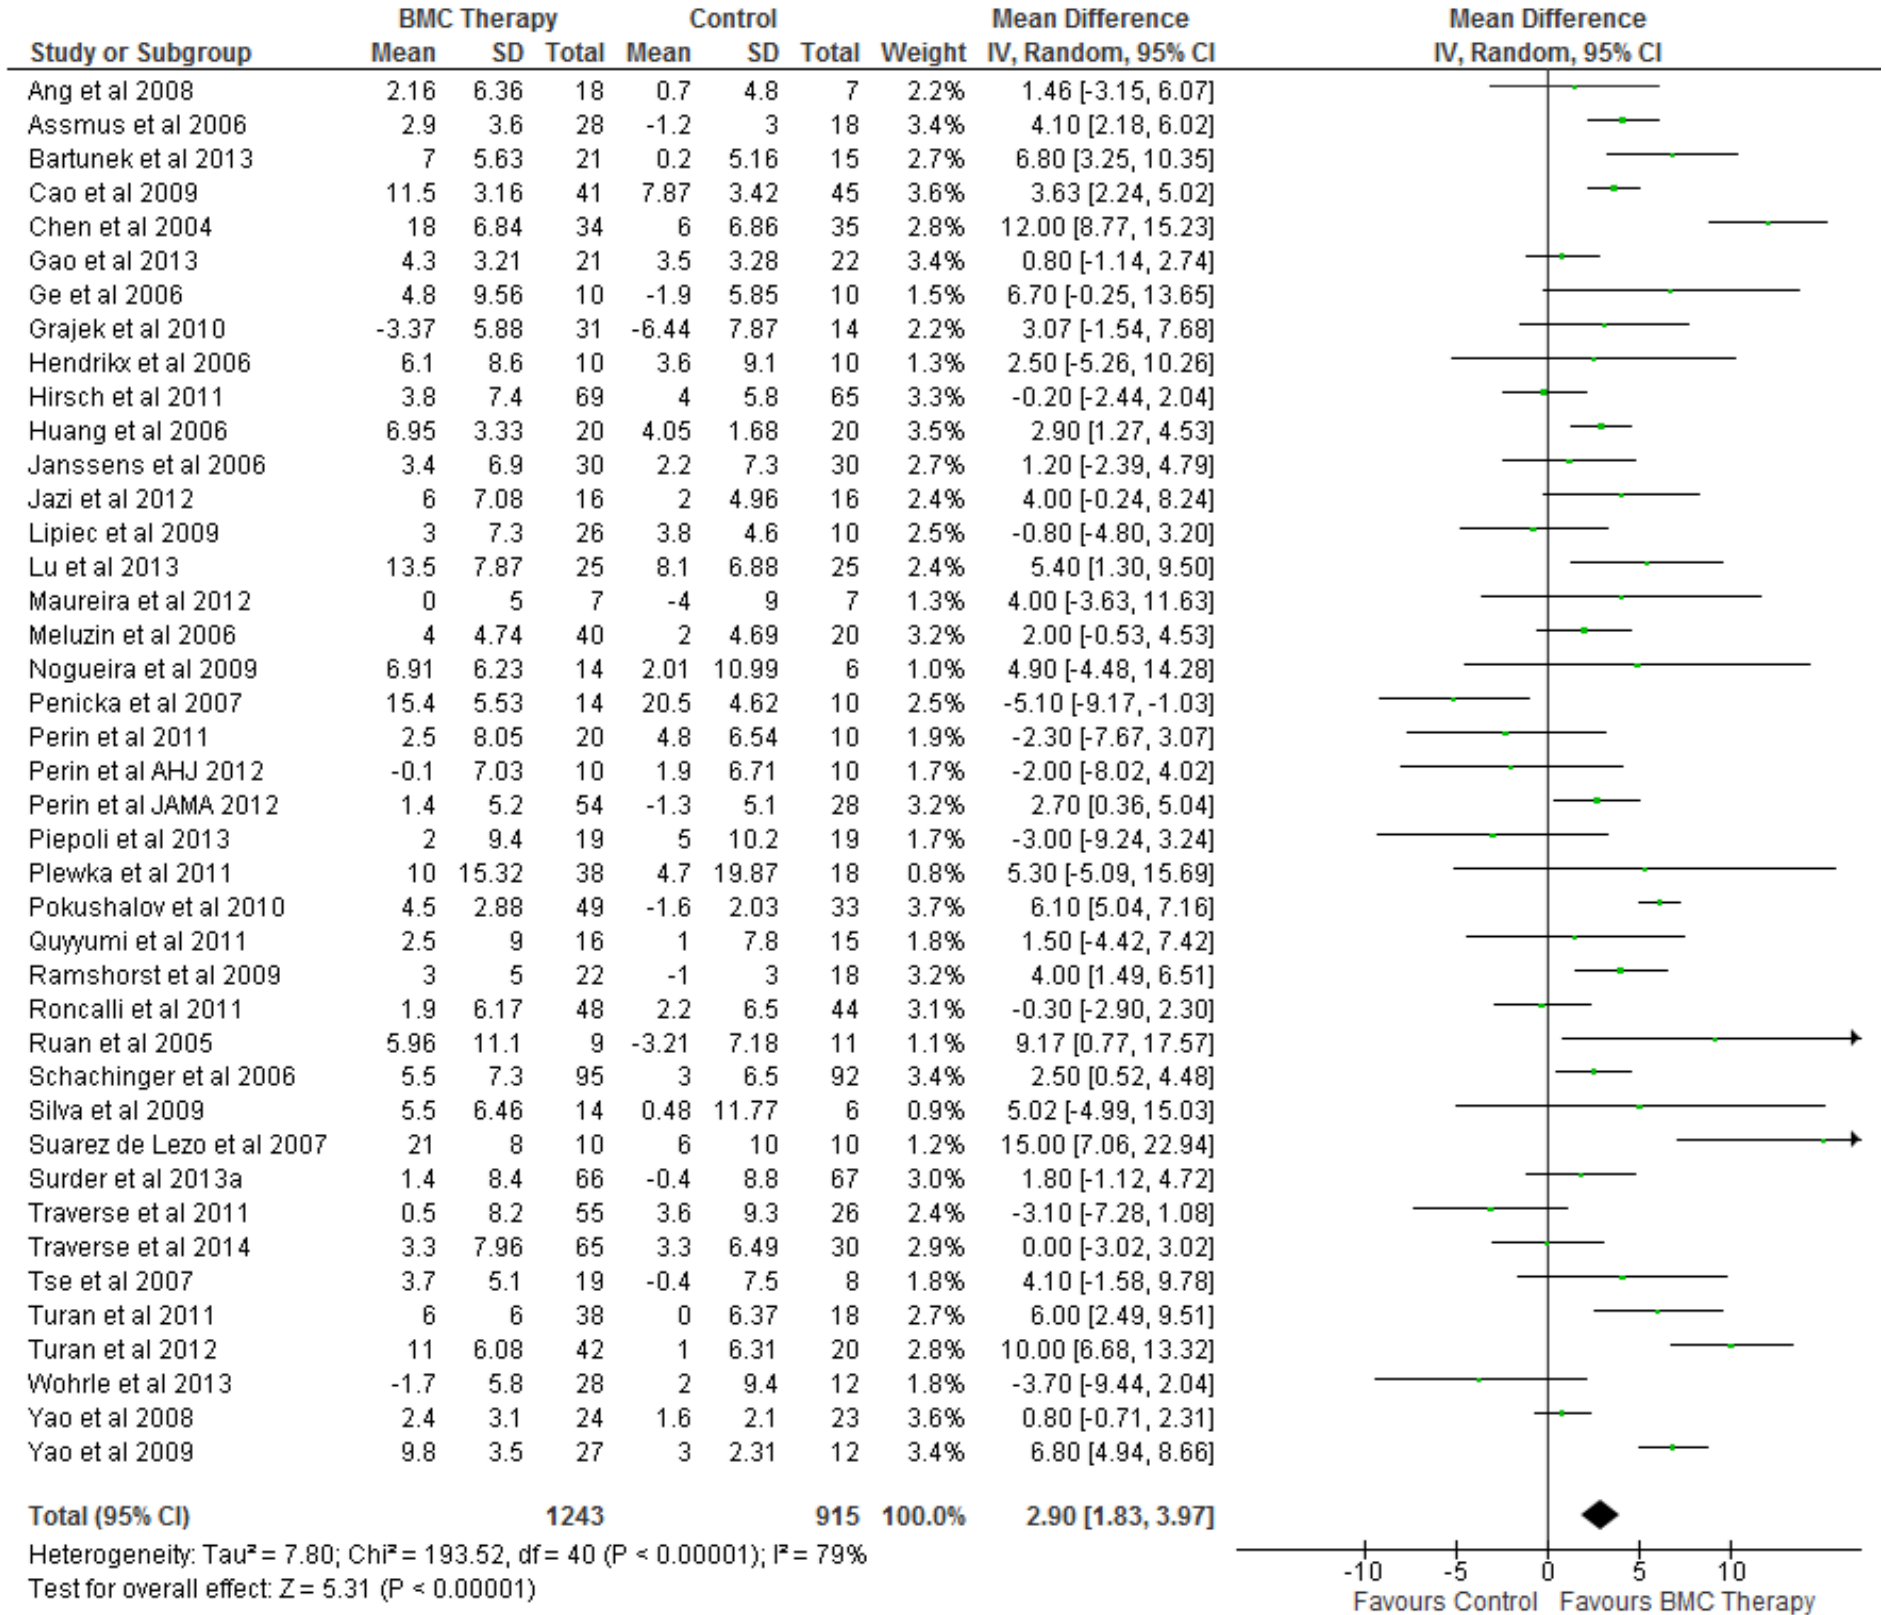



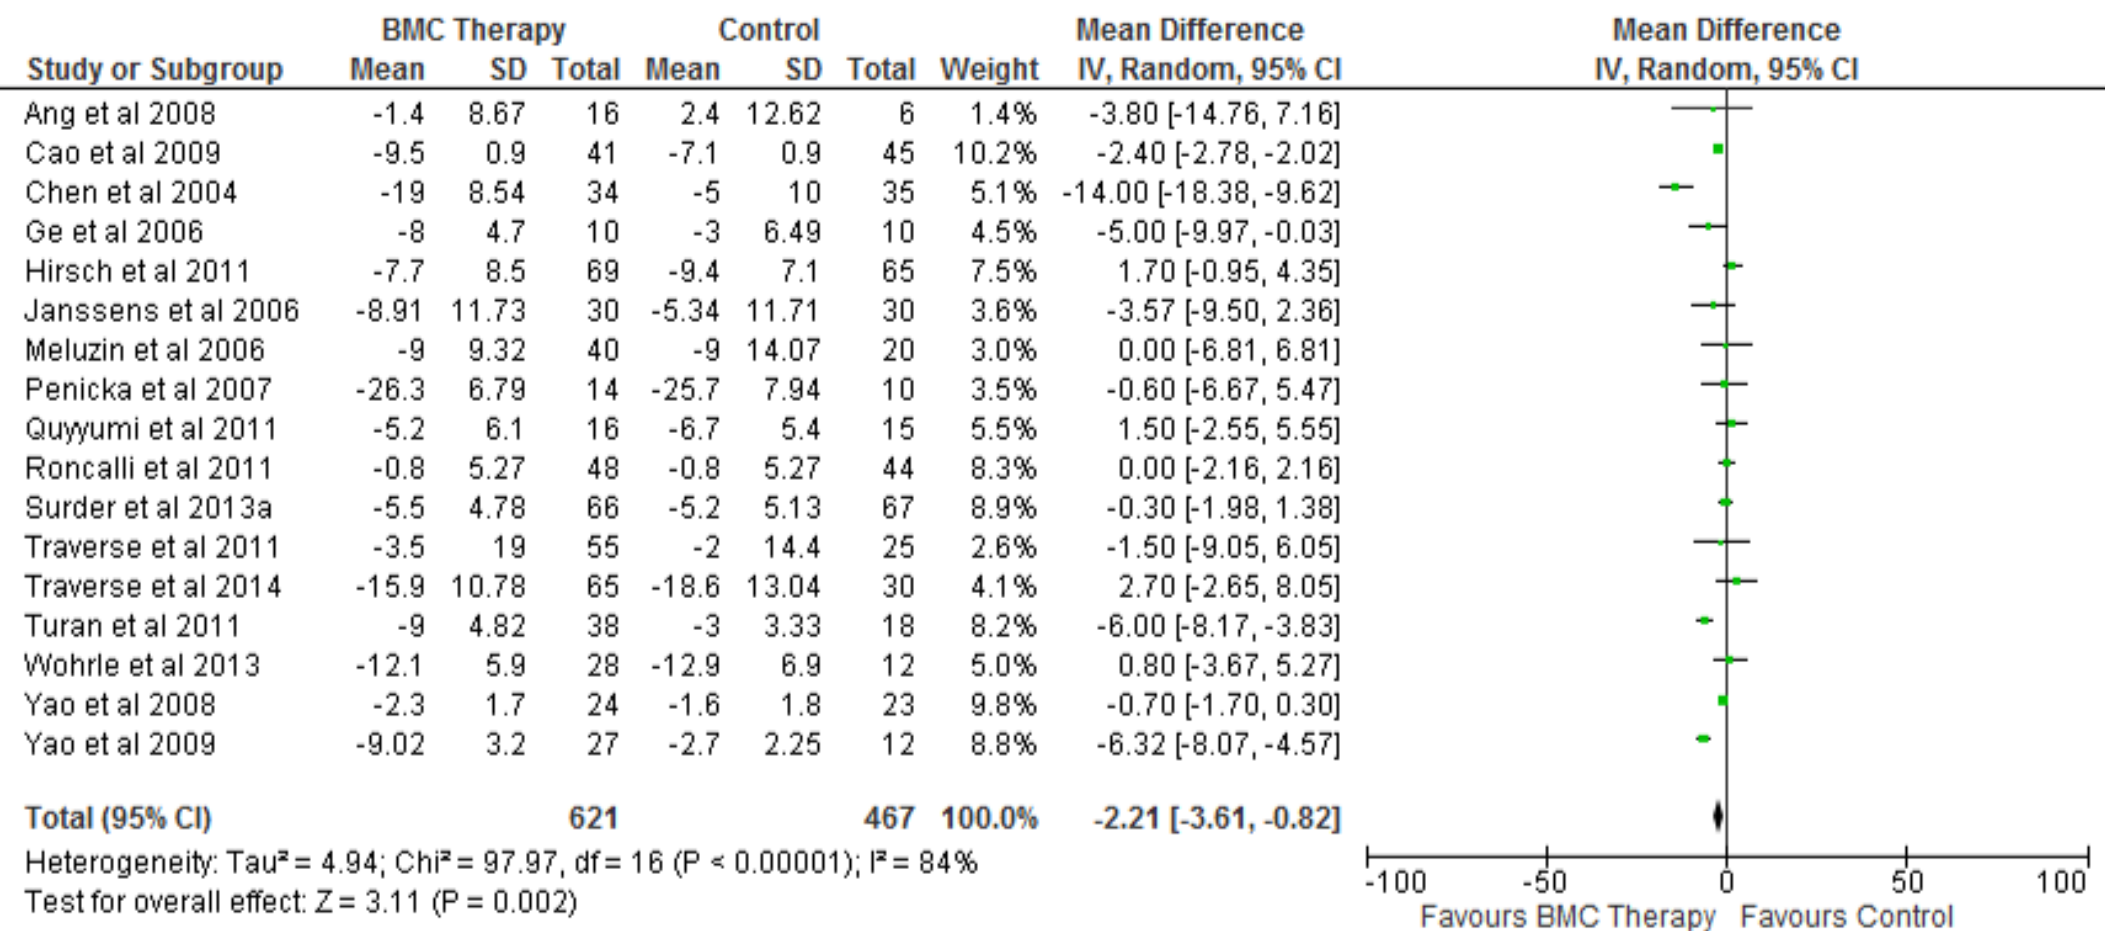

| Study or Subgroup         | BMC Therapy |       |            | Control |       |            | Weight        | Mean Difference<br>IV, Random, 95% CI |
|---------------------------|-------------|-------|------------|---------|-------|------------|---------------|---------------------------------------|
|                           | Mean        | SD    | Total      | Mean    | SD    | Total      |               |                                       |
| Ang et al 2008            | -6.3        | 36.9  | 18         | 17.9    | 25.27 | 7          | 1.2%          | -24.20 [-49.52, 1.12]                 |
| Assmus et al 2006         | -2          | 5     | 28         | -1      | 12    | 18         | 6.4%          | -1.00 [-6.84, 4.84]                   |
| Bartunek et al 2013       | -24.8       | 25.92 | 21         | -8.8    | 27.45 | 15         | 2.1%          | -16.00 [-33.77, 1.77]                 |
| Cao et al 2009            | -13.2       | 5.02  | 41         | -6.9    | 6.49  | 45         | 8.0%          | -6.30 [-8.74, -3.86]                  |
| Gao et al 2013            | -4.1        | 11    | 21         | -3.6    | 11.73 | 22         | 5.9%          | -0.50 [-7.29, 6.29]                   |
| Grajek et al 2010         | 10.12       | 11.83 | 31         | 19.01   | 21.56 | 14         | 3.6%          | -8.89 [-20.93, 3.15]                  |
| Hendriks et al 2006       | -8.67       | 29.24 | 10         | -2.21   | 23.97 | 10         | 1.4%          | -6.46 [-29.89, 16.97]                 |
| Janssens et al 2006       | -1.87       | 19.04 | 30         | 1.02    | 19.72 | 30         | 4.4%          | -2.89 [-12.70, 6.92]                  |
| Lipiec et al 2009         | 5           | 34.3  | 26         | 3.4     | 28    | 10         | 1.5%          | 1.60 [-20.19, 23.39]                  |
| Maureira et al 2012       | 4           | 20    | 7          | -2      | 25    | 7          | 1.3%          | 6.00 [-17.72, 29.72]                  |
| Meluzin et al 2006        | -6          | 21.2  | 40         | 6       | 28.14 | 20         | 3.0%          | -12.00 [-25.97, 1.97]                 |
| Nogueira et al 2009       | -12.76      | 8.02  | 14         | 8.14    | 29.82 | 6          | 1.3%          | -20.90 [-45.13, 3.33]                 |
| Penicka et al 2007        | -3.1        | 15.72 | 14         | -2      | 18.28 | 10         | 3.0%          | -1.10 [-15.11, 12.91]                 |
| Perin et al AHJ 2012      | -7.3        | 26.91 | 10         | -0.2    | 42.32 | 10         | 0.8%          | -7.10 [-38.18, 23.98]                 |
| Piepoli et al 2013        | 2.6         | 33.9  | 19         | 4       | 55.8  | 19         | 0.9%          | -1.40 [-30.76, 27.96]                 |
| Pokushalov et al 2010     | -33         | 25.28 | 49         | 3       | 20.91 | 33         | 4.3%          | -36.00 [-46.05, -25.95]               |
| Quyumi et al 2011         | 3.4         | 22.1  | 16         | -1.84   | 17.1  | 15         | 3.0%          | 5.24 [-8.62, 19.10]                   |
| Ramshorst et al 2009      | -4          | 15    | 22         | -1      | 10    | 18         | 5.4%          | -3.00 [-10.79, 4.79]                  |
| Ruan et al 2005           | -4.69       | 21.88 | 9          | 19.1    | 26.46 | 11         | 1.6%          | -23.79 [-44.98, -2.60]                |
| Schachinger et al 2006    | -0.6        | 19    | 95         | 5.6     | 22    | 92         | 6.4%          | -6.20 [-12.10, -0.30]                 |
| Suarez de Lezo et al 2007 | -27         | 15.44 | 10         | 4       | 22.8  | 10         | 2.3%          | -31.00 [-48.07, -13.93]               |
| Surder et al 2013a        | 17          | 29.14 | 66         | 18      | 29.96 | 67         | 4.3%          | -1.00 [-11.04, 9.04]                  |
| Traverse et al 2011       | 0.2         | 14    | 55         | -2.3    | 14.7  | 26         | 5.9%          | 2.50 [-4.25, 9.25]                    |
| Tse et al 2007            | -8.8        | 18.4  | 19         | -3.1    | 14.4  | 8          | 3.3%          | -5.70 [-18.66, 7.26]                  |
| Turan et al 2011          | -9          | 12.96 | 38         | 0       | 11.47 | 18         | 5.9%          | -9.00 [-15.71, -2.29]                 |
| Turan et al 2012          | -21         | 13.15 | 42         | -2      | 19.49 | 20         | 4.6%          | -19.00 [-28.42, -9.58]                |
| Yao et al 2009            | -7.26       | 2.07  | 27         | -4.5    | 2.25  | 12         | 8.3%          | -2.76 [-4.25, -1.27]                  |
| <b>Total (95% CI)</b>     |             |       | <b>778</b> |         |       | <b>573</b> | <b>100.0%</b> | <b>-7.14 [-10.14, -4.15]</b>          |

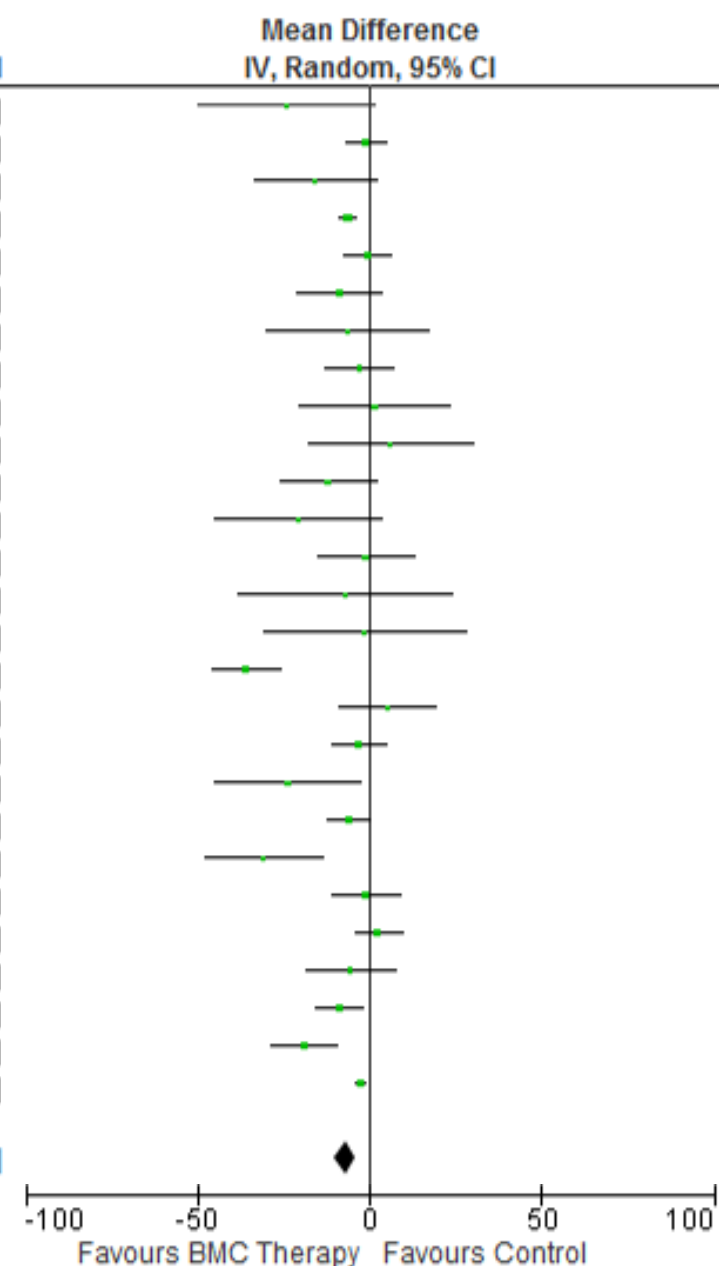

Heterogeneity:  $\tau^2 = 27.73$ ;  $\chi^2 = 86.78$ ,  $df = 26$  ( $P < 0.00001$ );  $I^2 = 70\%$   
 Test for overall effect:  $Z = 4.67$  ( $P < 0.00001$ )

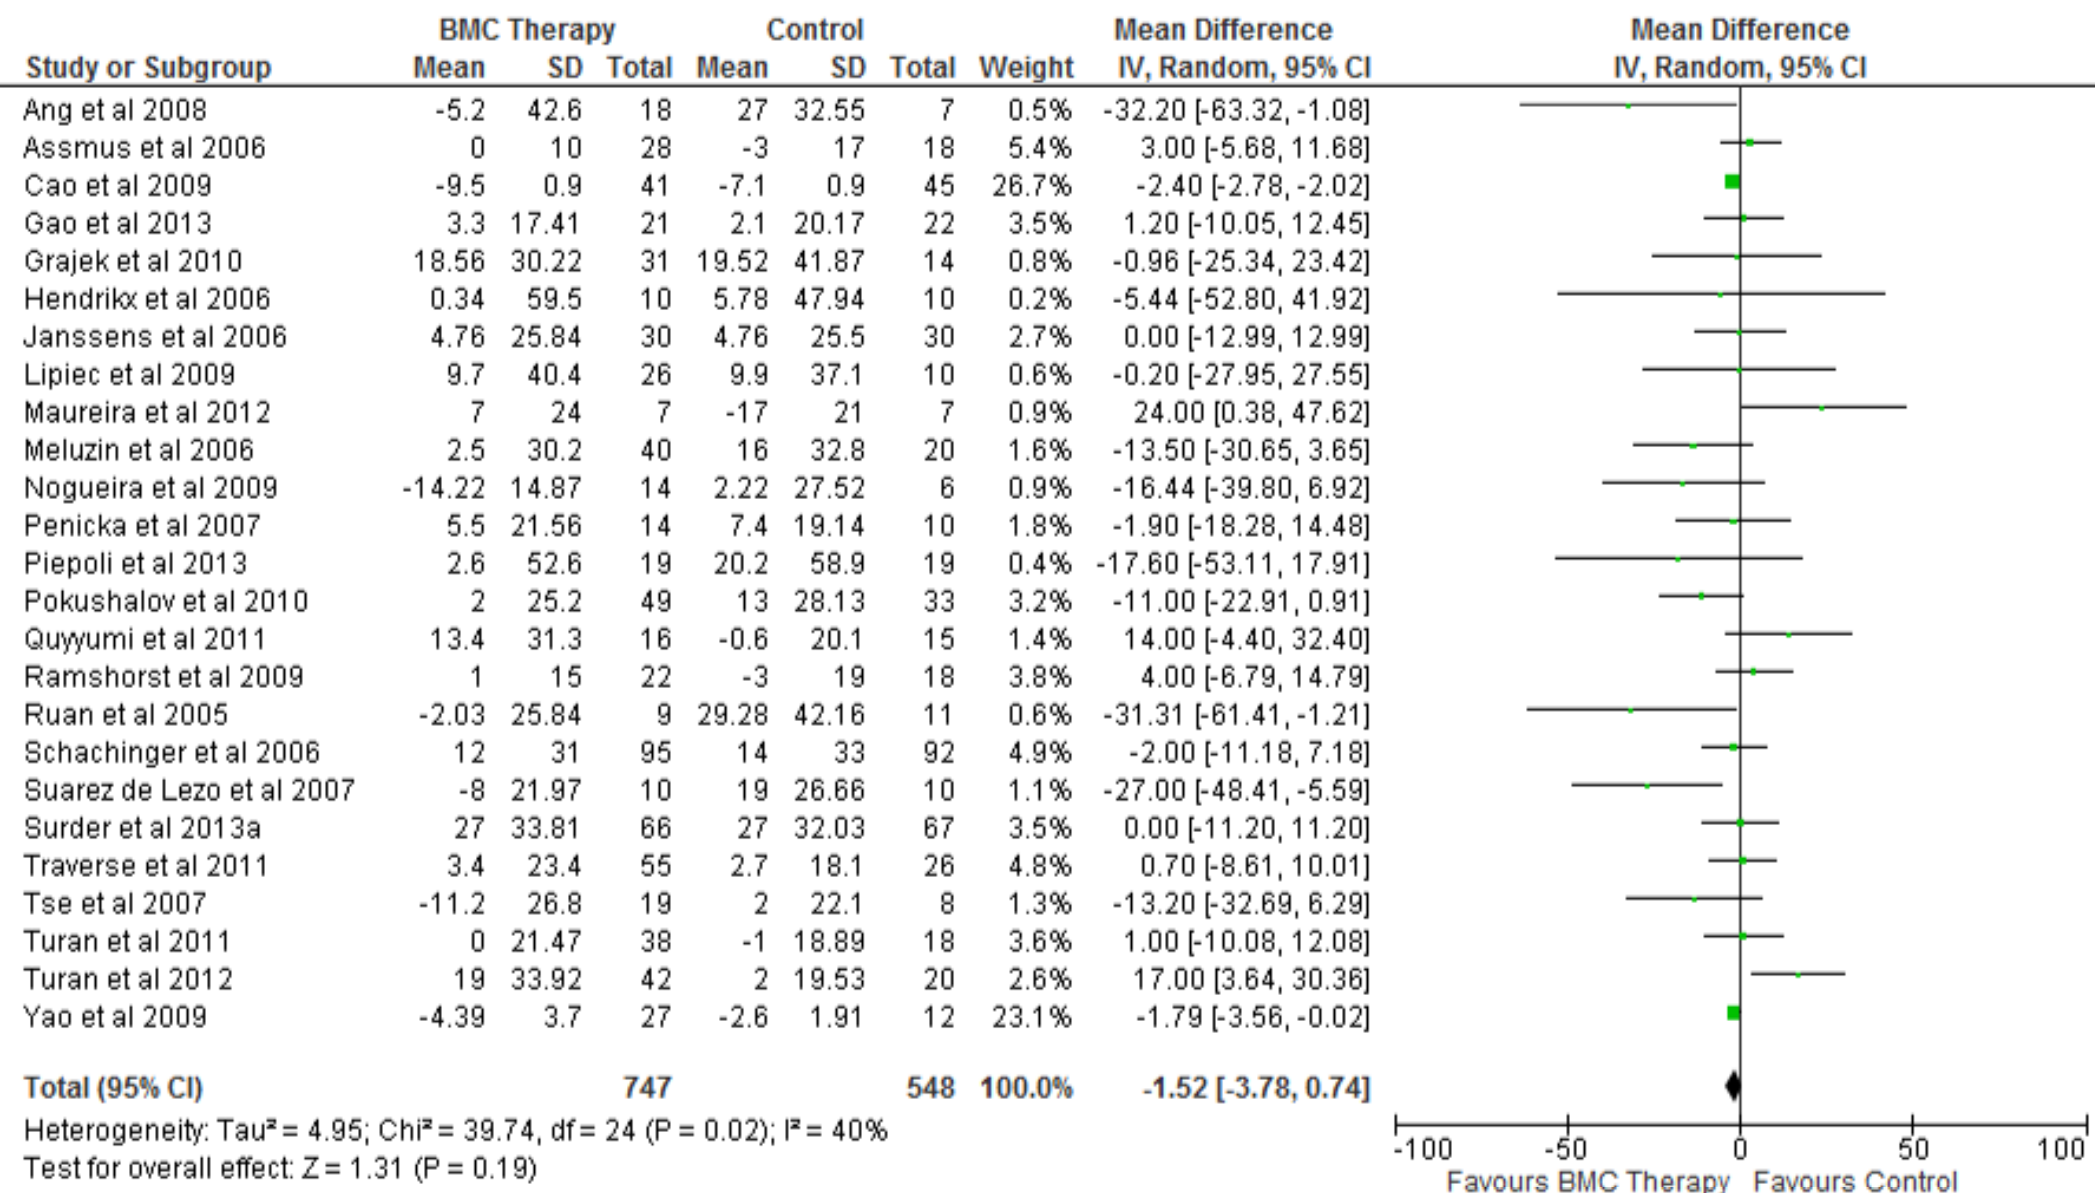

**Online Figure VI (A-D).**

**(6A) Funnel Plot for the assessment of publication bias for LVEF.**

The upper panel shows the funnel plot using the effect size on the X-axis and standard error (SE) on the Y-axis. The lower panel shows Egger's publication bias plot using standardized effect on the Y-axis and precision on the X-axis. The funnel plot and Egger's test did not show any evidence of publication Bias.

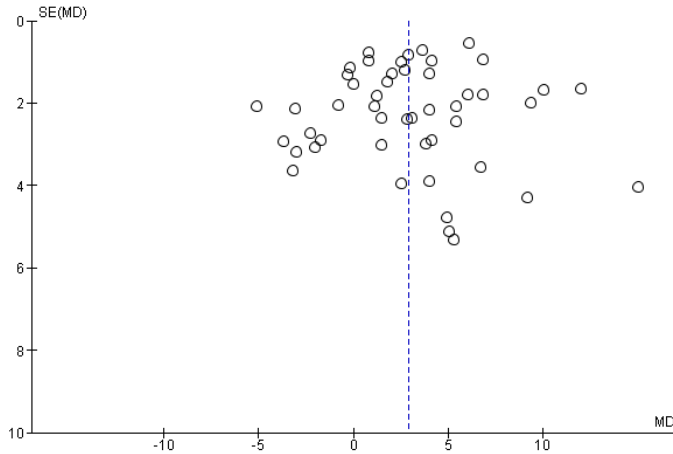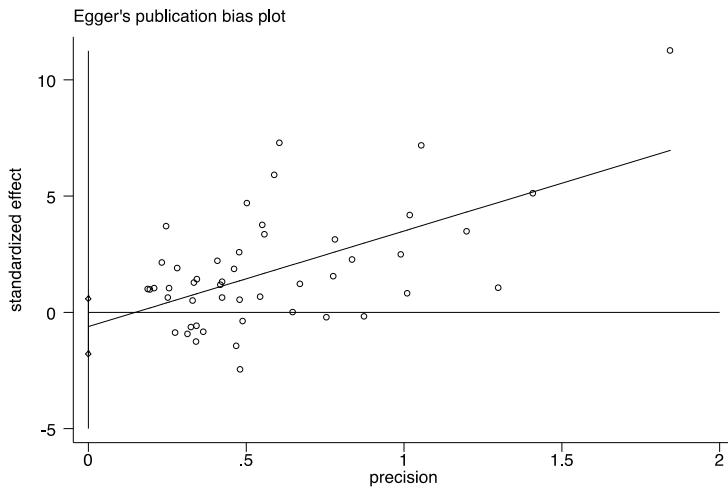

Egger's test

| Std_Eff | Coef.     | Std. Err. | t     | P> t  | [95% Conf. Interval] |          |
|---------|-----------|-----------|-------|-------|----------------------|----------|
| slope   | 4.10966   | .8680184  | 4.73  | 0.000 | 2.36243              | 5.85689  |
| bias    | -.6120863 | .5898122  | -1.04 | 0.305 | -1.799317            | .5751441 |

**(6B) Funnel Plot for the assessment of publication bias for LVESV.**

The upper panel shows the funnel plot using the effect size on the X-axis and standard error (SE) on the Y-axis. The lower panel shows Egger's publication bias plot using standardized effect on the Y-axis and precision on the X-axis. The funnel plot and Egger's test did not show any evidence of publication Bias.

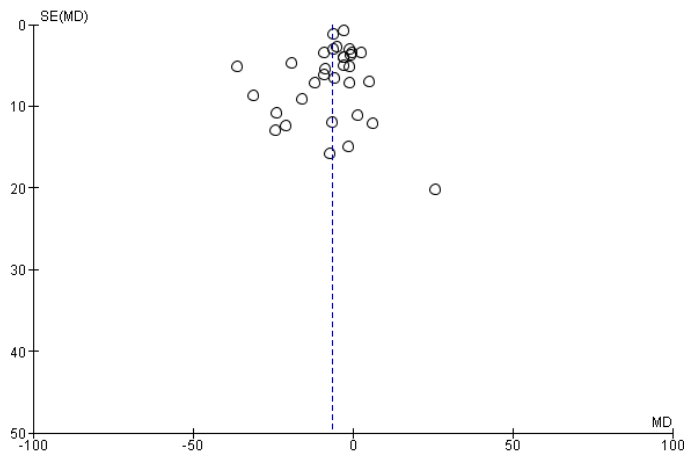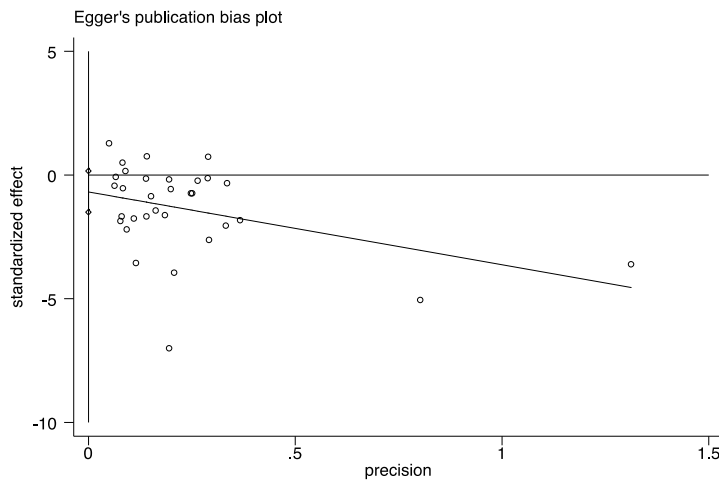

Egger's test

| Std_Eff | Coef.     | Std. Err. | t     | P> t  | [95% Conf. Interval] |           |
|---------|-----------|-----------|-------|-------|----------------------|-----------|
| slope   | -2.945084 | 1.22748   | -2.40 | 0.023 | -5.451931            | -.4382356 |
| bias    | -.6841486 | .4090674  | -1.67 | 0.105 | -1.519576            | .1512784  |

**(6C) Funnel Plot for the assessment of publication bias for LVEDV.**

The upper panel shows the funnel plot using the effect size on the X-axis and standard error (SE) on the Y-axis. The lower panel shows Egger's publication bias plot using standardized effect on the Y-axis and precision on the X-axis. The funnel plot and Egger's test did not show any evidence of publication Bias.

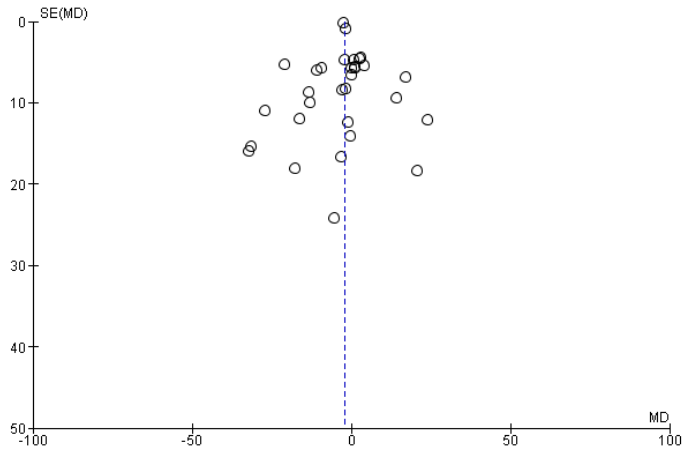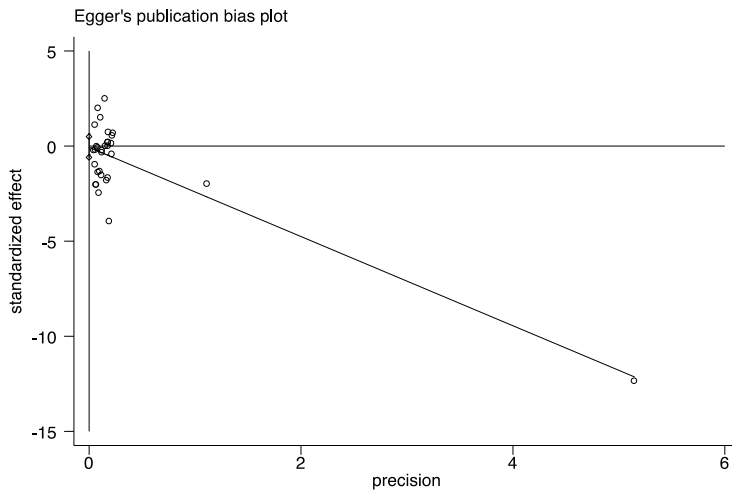

Egger's test

| Std_Eff | Coef.     | Std. Err. | t     | P> t  | [95% Conf. Interval] |           |
|---------|-----------|-----------|-------|-------|----------------------|-----------|
| slope   | -2.345465 | .2778366  | -8.44 | 0.000 | -2.913705            | -1.777225 |
| bias    | -.0665326 | .265396   | -0.25 | 0.804 | -.6093284            | .4762631  |

### (6D) Funnel Plot for the assessment of publication bias for Infarct Size.

The upper panel shows the funnel plot using the effect size on the X-axis and standard error (SE) on the Y-axis. The lower panel shows Egger's publication bias plot using standardized effect on the Y-axis and precision on the X-axis. The funnel plot and Egger's test did not show any evidence of publication Bias.

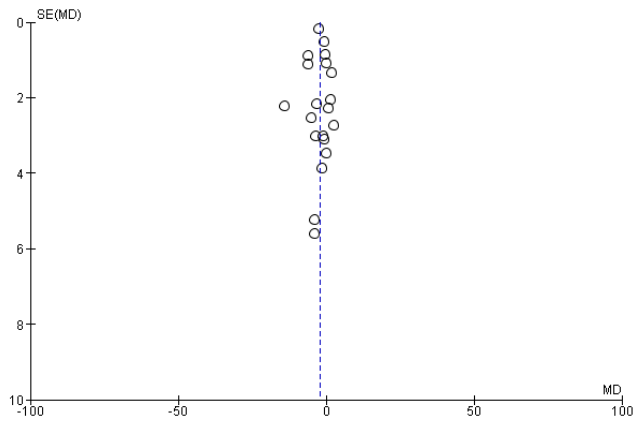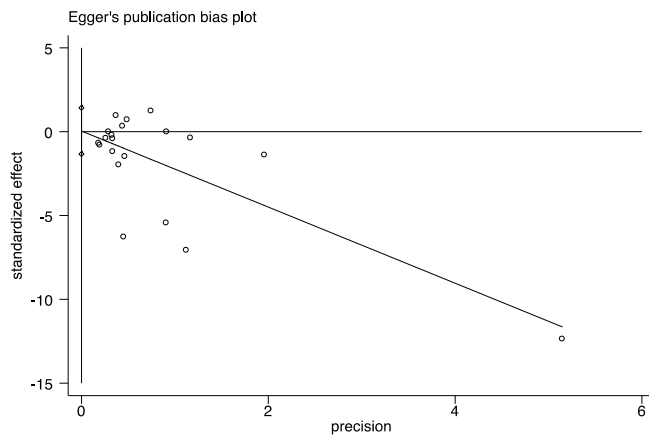

Egger's test

| Std_Eff | Coef.     | Std. Err. | t     | P> t  | [95% Conf. Interval] |           |
|---------|-----------|-----------|-------|-------|----------------------|-----------|
| slope   | -2.268879 | .4845653  | -4.68 | 0.000 | -3.286913            | -1.250845 |
| bias    | .0364451  | .6570608  | 0.06  | 0.956 | -1.343988            | 1.416879  |
